# Supplementary material for: Inkjet-printed polymer-based electrochromic and electrofluorochromic dual-mode displays
Source: Royal Society of Chemistry journal article supplement (doi:10.1039/c9tc01344j), 2019-01-01
Supplement: c9tc01344j3.pdf [file c9tc01344j3.pdf]

## Supporting Information

# Inkjet-Printed Polymer-based Electrochromic and Electrofluorochromic Dual-mode Displays

Manuel Pietsch,<sup>a,b,d</sup> Tobias Rödlmeier,<sup>a,b</sup> Stefan Schliske,<sup>a,b</sup> Johannes Zimmermann,<sup>a,b</sup> Carlos Romero-Nieto<sup>c,d,e\*</sup> and Gerardo Hernandez-Sosa<sup>a,b,d\*</sup>

---

<sup>a</sup> Light Technology Institute, Karlsruhe Institute of Technology, Engesserstr. 13, 76131 Karlsruhe; Germany

<sup>b</sup> InnovationLab, Speyererstr. 4, 69115 Heidelberg; Germany

<sup>c</sup> Institute of Organic Chemistry, University Heidelberg, Im Neuenheimer Feld 270, 69129 Heidelberg; Germany

<sup>d</sup> HEiKA – Heidelberg Karlsruhe Research Partnership, Heidelberg University, Karlsruhe Institute of Technology (KIT); Germany

<sup>e</sup> Faculty of Pharmacy, University of Castilla-La Mancha, Calle Almansa 14 – Edif. Bioincubadora, 02008, Albacete, Spain

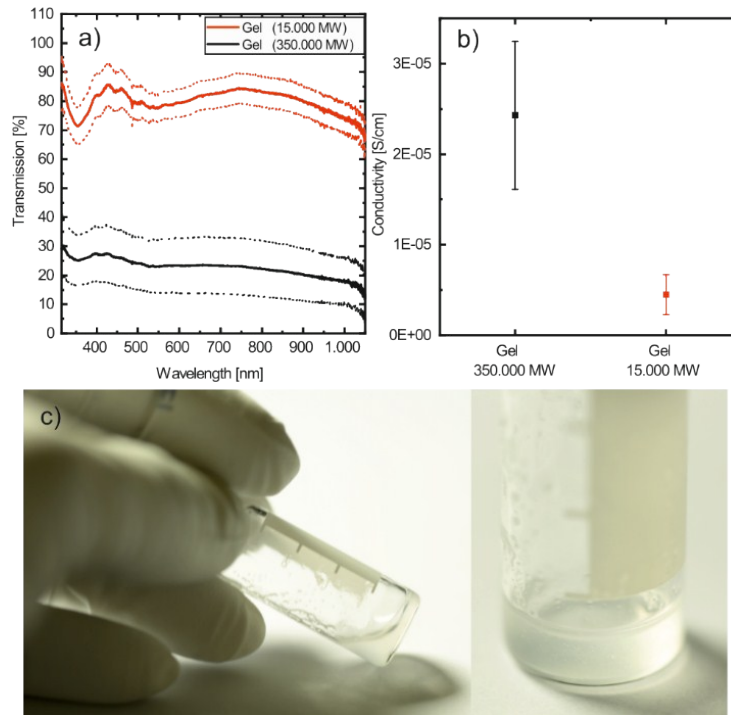

**Figure S1:** a) Transmittance and b) conductivity of polymer electrolytes with different molecular weights. c) Pictures of the used electrolyte.

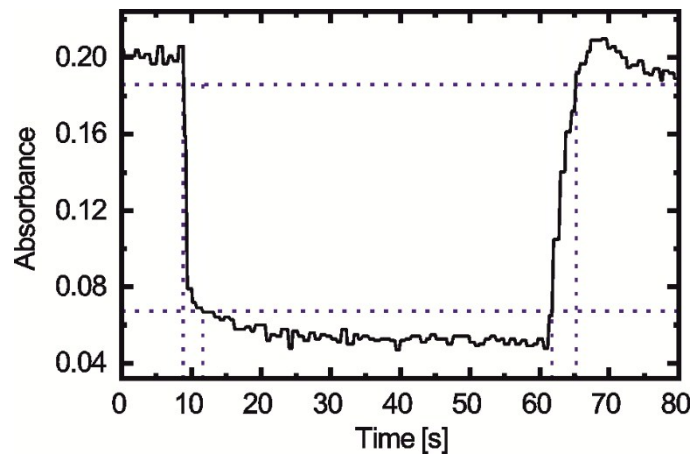

**Figure S2:** Change of absorbance in the EFCDs with PIF8-TAA under oxidation and reduction. The dotted lines show the values for calculating the switching time.

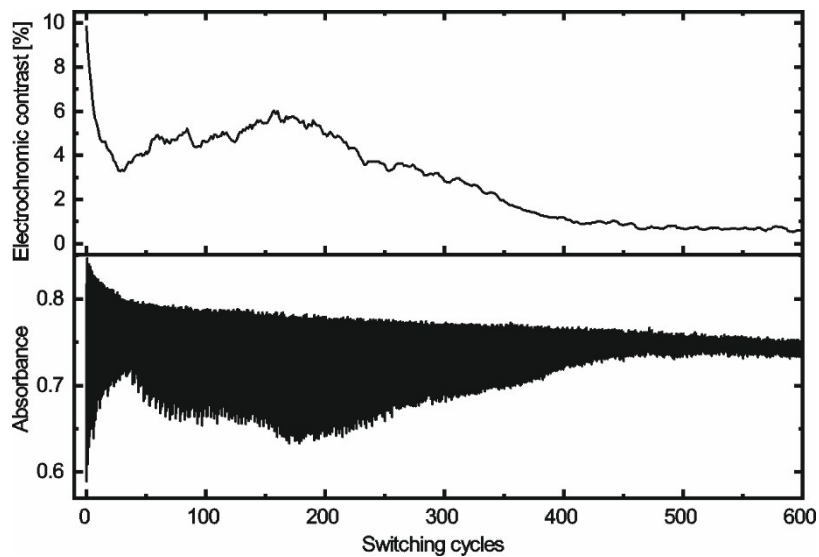

**Figure S3:** Electrochromic contrast and the change in absorbance at a wavelength of 395nm over 600 cycles with a period of 40s

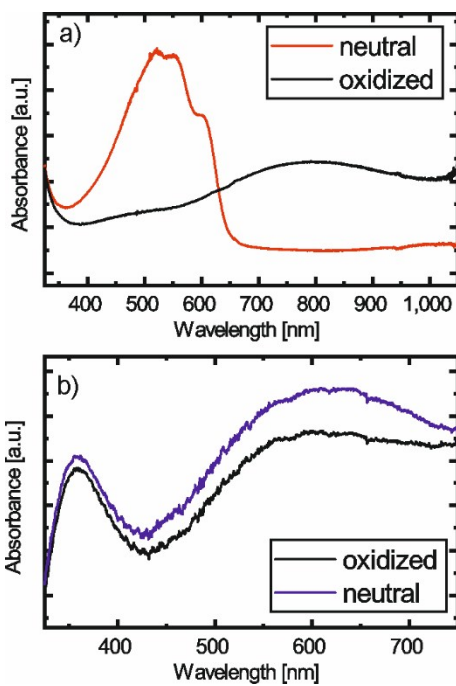

**Figure S4:** Absorption spectra of single a) P3HT and b) PEDOT in their neutral and oxidized forms.

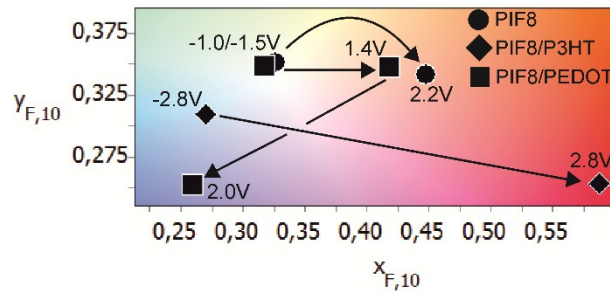

**Figure S5:** CIE coordinates of all the different devices.

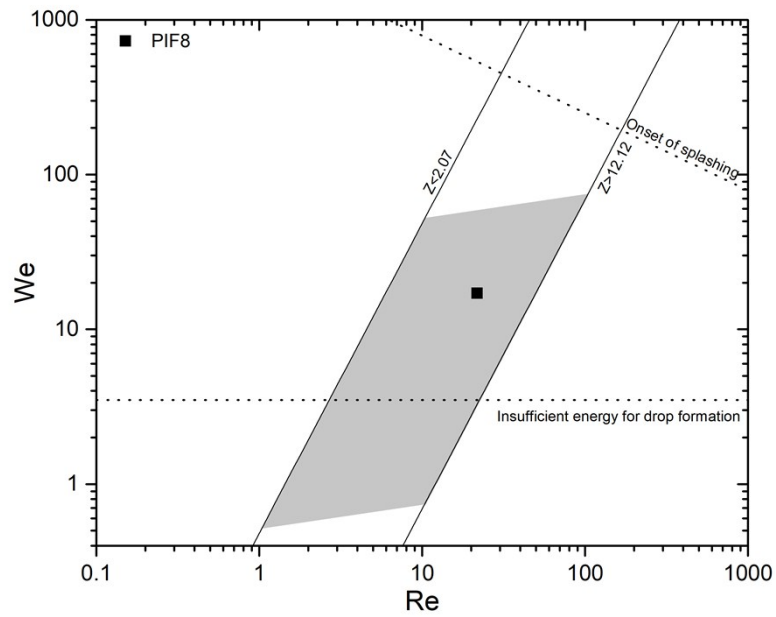

**Figure S6:** Reynolds and Weber number of the PIF8-TAA ink and the theoretical printability window (grey).

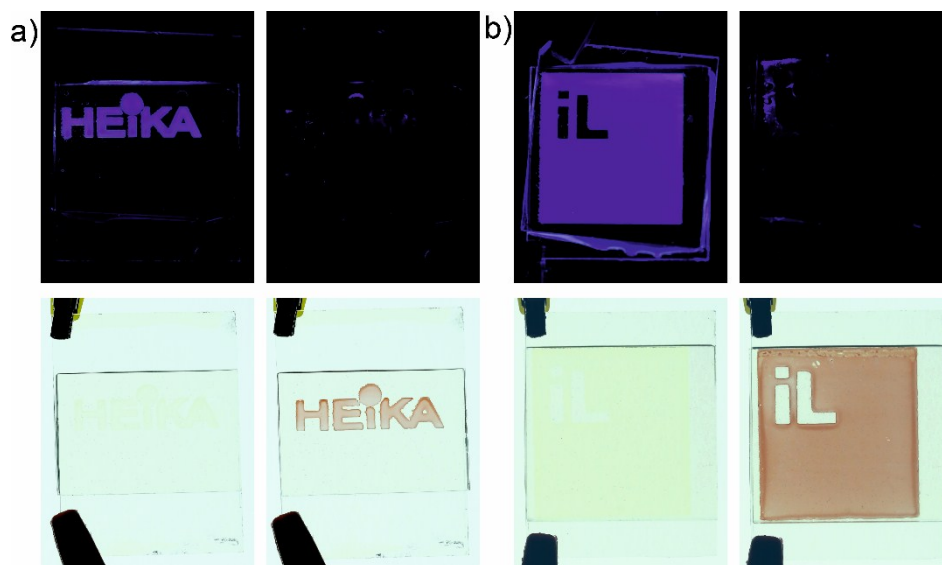

**Figure S7:** Printed electrofluorochromic logos of our institutions.
